# Supplementary material
Source: PubMed Central journal article supplement (PMC3118761)

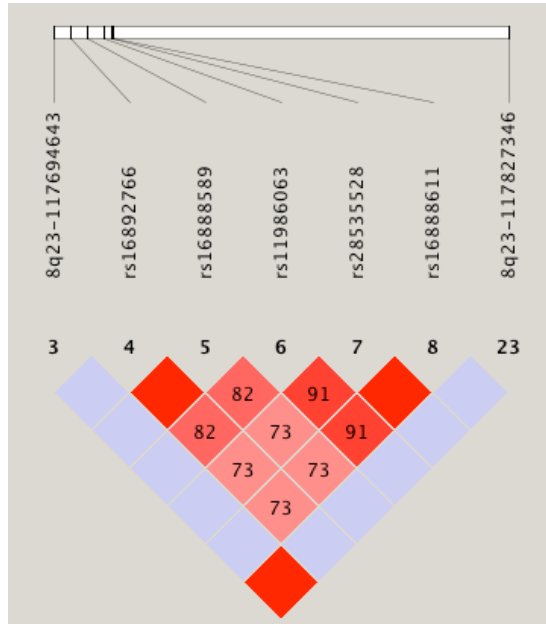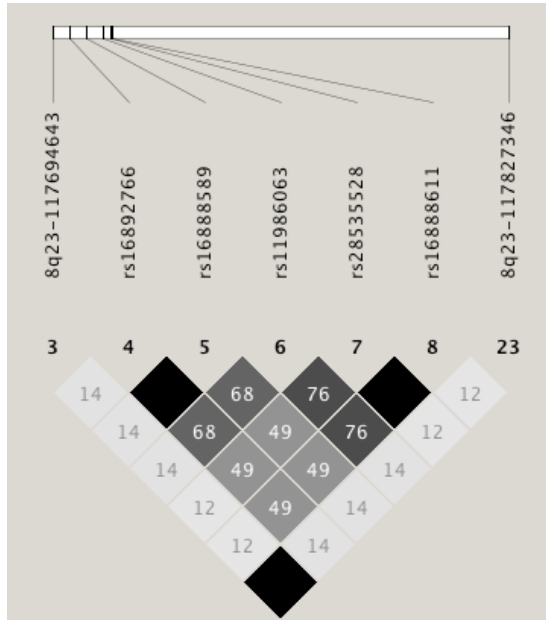

Supplement: supp_ddr190_ddr190supp_figure1.pdf [file supp_ddr190_ddr190supp_figure1.pdf]

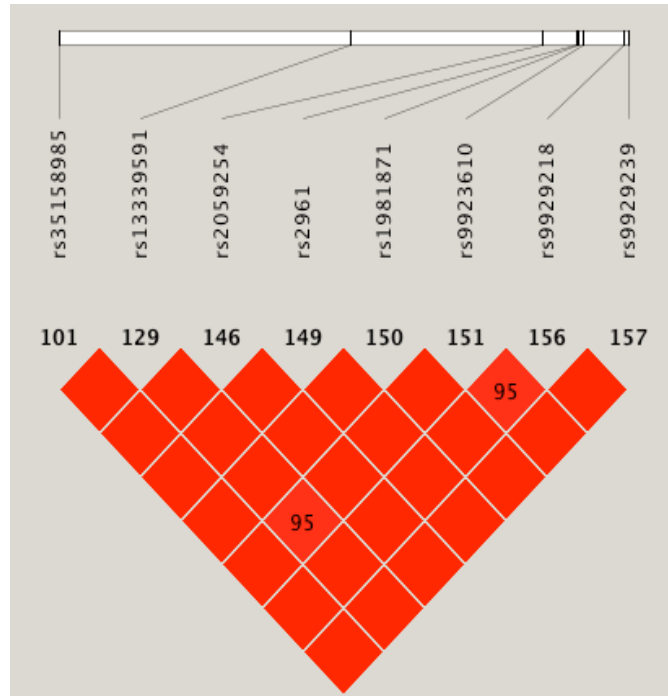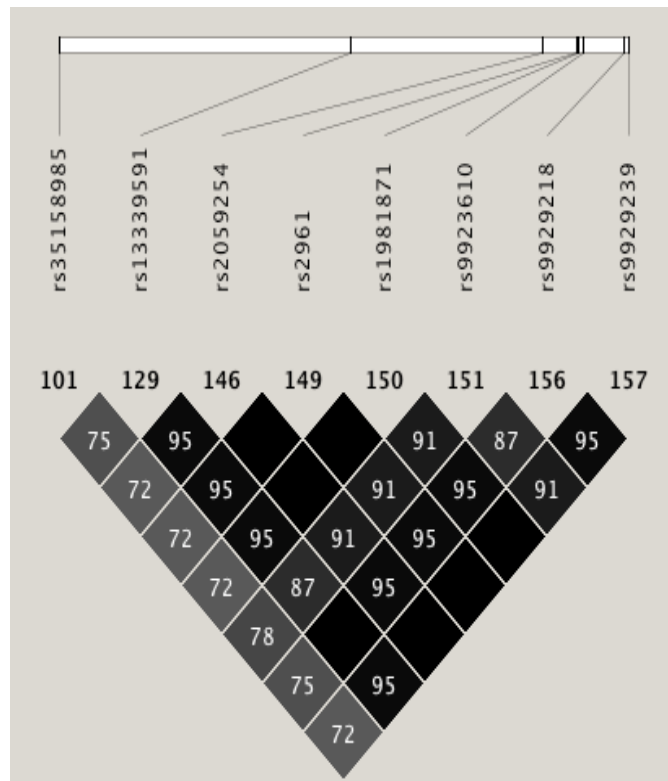

Supplement: supp_ddr190_ddr190supp_figure2.pdf [file supp_ddr190_ddr190supp_figure2.pdf]
